# Supplementary material
Source: publisher figshare collection journal article supplement (https://acs.figshare.com/ndownloader/files/24115868)
Supplement: Supplementary file 1 [file 24115868]

# Efficient Recovery of End-of-Life NdFeB Permanent Magnets by Selective Leaching with Deep Eutectic Solvents

Chuanying Liu<sup>†</sup>, Qibin Yan<sup>†</sup>, Xingwang Zhang<sup>†,‡</sup>, Lecheng Lei<sup>†,‡</sup>, Chengliang Xiao<sup>†,‡,\*</sup>

<sup>†</sup> College of Chemical and Biological Engineering, Zhejiang University, Hangzhou 310027, China

<sup>‡</sup> Institute of Zhejiang University - Quzhou, 78 Jiuhua Boulevard North, Quzhou 324000, China

\*Email: [xiaoc@zju.edu.cn](mailto:xiaoc@zju.edu.cn) (Chengliang Xiao)

**Number of Pages: 22**

**Number of Figures: 33**

**Number of Tables: 6**

**Chemicals and Materials.** Guanidine hydrochloride (99.0%), 1-aminoguanidine hydrochloride (99%), 1,3-diaminoguanidine hydrochloride (99%), choline chloride (99%), glycolic acid (99.0%), ethylene glycol (99.5%), malic acid (99.5%), L-lactic acid (90% in water), and glycerol (99%) were purchased from Shanghai Macklin Biochemical Co., Ltd. Neodymium(III) oxide (Nd<sub>2</sub>O<sub>3</sub>, 99.99%) and iron(III) oxide (Fe<sub>2</sub>O<sub>3</sub>, 99.99%) were purchased from Shanghai Aladdin Biochemical Co., Ltd. Neodymium(III) chloride (NdCl<sub>3</sub>, 99.99%) were purchased from Shanghai Yuanye Biochemical Co., Ltd. All chemicals were used as received. The standard solutions of Nd and Fe bought from Guobiao (Beijing) Testing & Certification Co., Ltd. Working solutions ranging from 1 to 10 mg L<sup>-1</sup> of Nd and Fe were prepared via diluting the standard solution. The neodymium lactate (NdLAC<sub>3</sub>) was prepared by dissolving the Nd<sub>2</sub>O<sub>3</sub> into the aqueous lactic acid solution. Then the solution was concentrated by rotary evaporation and settled for the precipitation of the light purple solid. The roasted NdFeB permanent magnet was composed of Nd<sub>2</sub>O<sub>3</sub> and Fe<sub>2</sub>O<sub>3</sub> with a molar ratio of 1:7, as the same in the Nd<sub>2</sub>Fe<sub>14</sub>B.

**Characterization Methods.** The viscosity of DESs was determined using a Universal Rheometer (HAAKE RheoStress 6000, Thermo Fisher Scientific Inc., Germany). The glass transition temperature of DESs was achieved by differential scanning calorimetry (DSC), which was performed with a heating rate of 10 °C·min<sup>-1</sup> by the instrument (Q200, TA Instrument Company, America). All the DESs were run in aluminum hermetic crucibles, which were cooled to -90 °C before heated up to room temperature. Thermal gravimetric analysis (TGA) was conducted by the instrument (Q600, TA Instrument Company, America) from room temperature to 400 °C at a heating rate of 10 °C·min<sup>-1</sup> in a nitrogen atmosphere to get the DESs' onset decomposition temperature. <sup>1</sup>H NMR spectra were recorded on an NMR spectrometer (Bruker Avance III 500, Bruker Corporation, America) with dimethyl sulfoxide-d<sub>6</sub> as the solvent. Fourier transform infrared (FT-IR) spectra were recorded on an FT-IR spectrometer (Thermo iS50, Thermo Fisher Scientific Inc., Germany) in the range of 400 to 4000 cm<sup>-1</sup>. The UV-vis spectra of Nd loaded DESs was recorded by a UV-Vis-NIR spectrophotometer (UH5300, Hitachi High-Tech Corporation, Japan). The concentrations of Nd and Fe dissolved in the DESs were analyzed by an inductively coupled plasma optical atomic emission spectrometry (ICP-OES, 730-ES, Varian Inc., America). Before analysis, all the samples were digested in concentrated nitric acid using a microwave digestion system (MARS 6, CEM Corporation, America) and diluted by deionized water. Each analysis was repeated three times. The particle size was recorded by a laser diffraction particle sizing analyzer (LS13320, Beckman Coulter Inc., USA). Powder X-ray diffraction (PXRD) measurements were done with a Rigaku 114 Ultima IV diffractometer (Rigaku Corporation, Japan) using Cu K $\alpha$  radiation ( $\lambda=1.54184$  Å). Scanning Electron Microscope (SEM) and Energy-dispersive X-ray spectroscopy (EDS) were measured on a Field Emission Scanning Electron Microscope (SU8000, Hitachi High-Technologies Corporation, Japan).

**Calculation of Oxalic Acid Amount.** The solid-liquid ratio of oxalic acid to DES was chosen based on the fact that the oxalic acid is generally reacted with  $\text{Nd}^{3+}$  with a molar ratio of 3:2. The roasted NdFeB permanent magnet powders was composed of  $\text{Nd}_2\text{O}_3$  and  $\text{Fe}_2\text{O}_3$  with a molar ratio of 1:7. It was reacted with GUC-LAC in a mass ratio of 1:10 and the dissolution ratio was about 85%. Taking the molar mass of Nd,  $\text{Nd}_2\text{O}_3$ , GUC-LAC, and oxalic acid into consideration, it could be easily calculated the mass ratio of oxalic acid and the DES was 1:100.

**Calculation of Acids Consumption.** We only considered the reaction between acids and Nd, Fe, in the theoretical acids consumption. An ideal NdFeB magnets has a formula of  $\text{Nd}_2\text{Fe}_{14}\text{B}$ . After been totally oxidized, it would reacted with acids following the equations:

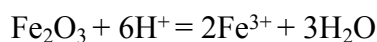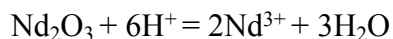

In solvent extraction process, the Nd and Fe were completely dissolved into the leaching liquor, 48 mole  $\text{H}^+$  was needed to treat 1 mole NdFeB. In selective leaching process, only Nd was dissolved into the leaching liquor, 6 mole  $\text{H}^+$  was needed to treat 1 mole NdFeB. The acids consumed in the selective leaching was only 1/8 of the complete leaching.

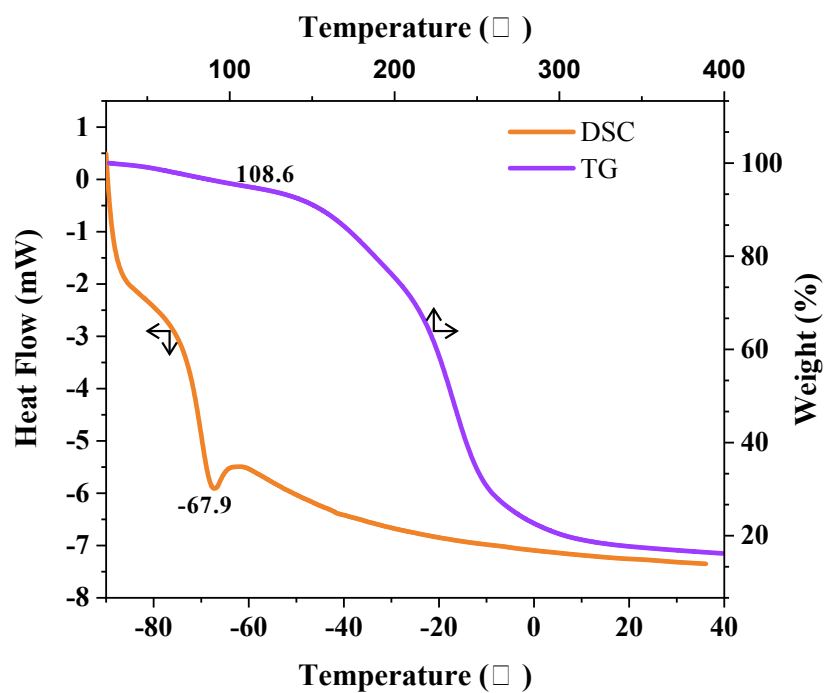

Figure S1. TG and DSC curves of GUC-GA

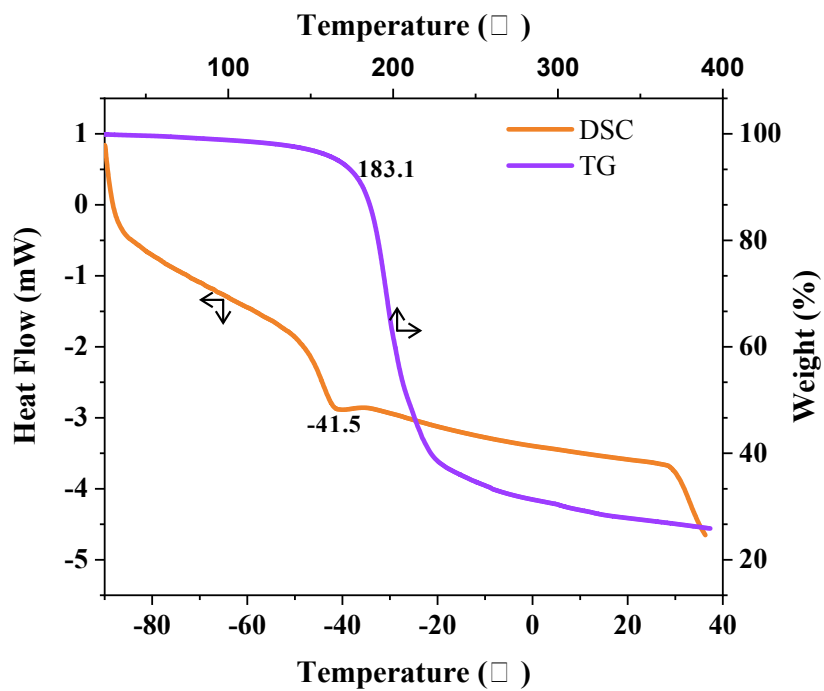

Figure S2. TG and DSC curves of GUC-MA

67

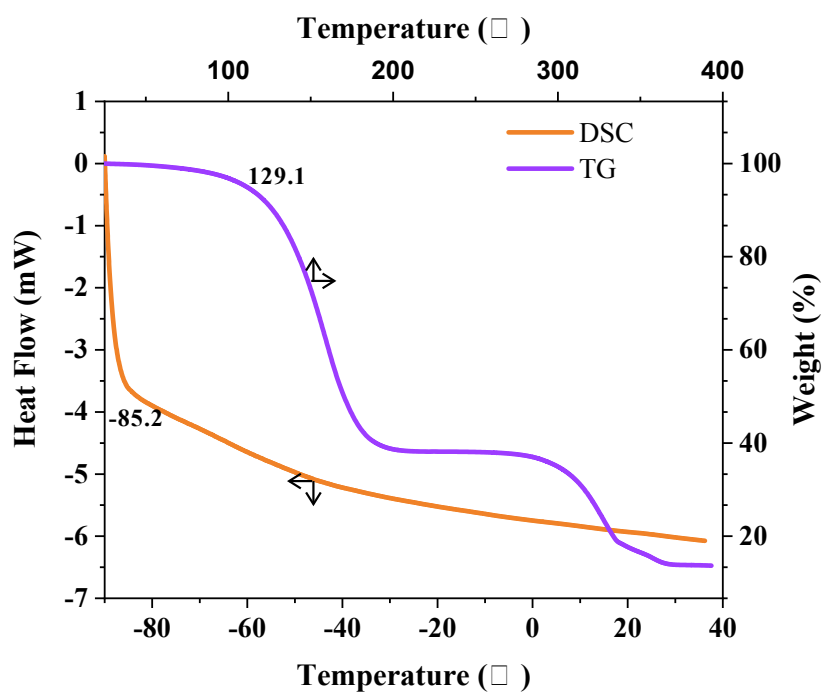

68

69

**Figure S3.** TG and DSC curves of GUC-EG

70

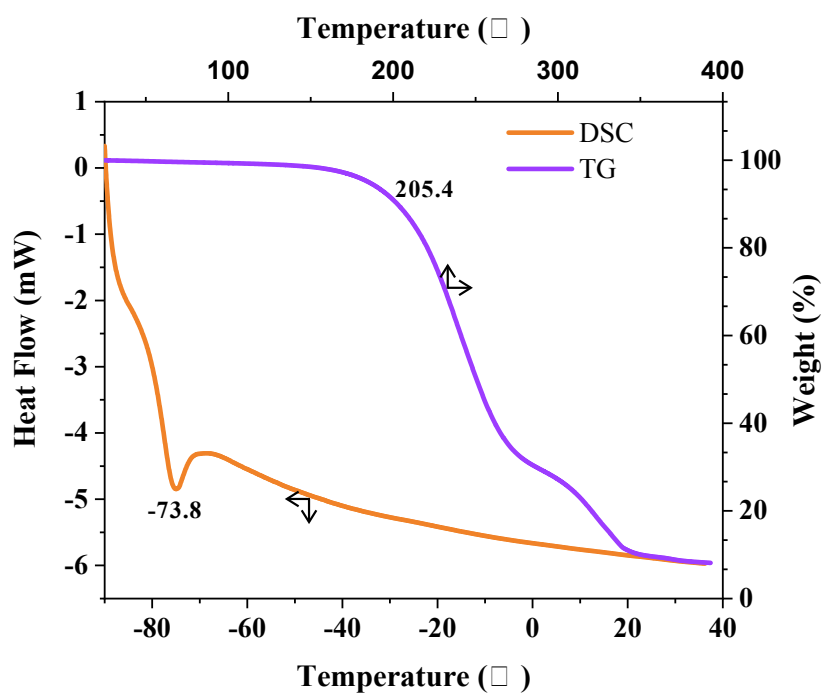

71

72

**Figure S4.** TG and DSC curves of GUC-GLY

73

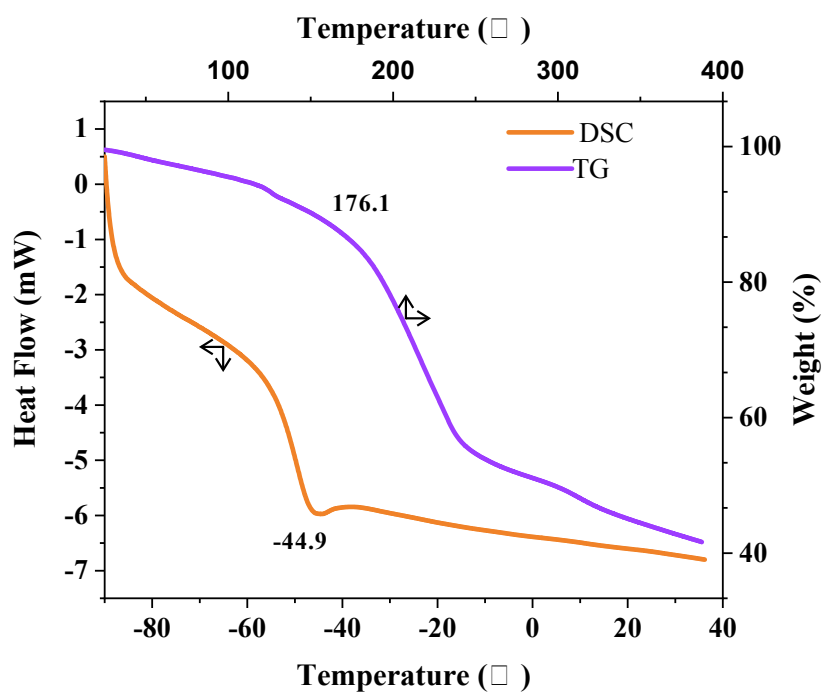

74

75

**Figure S5.** TG and DSC curves of AGU-GA

76

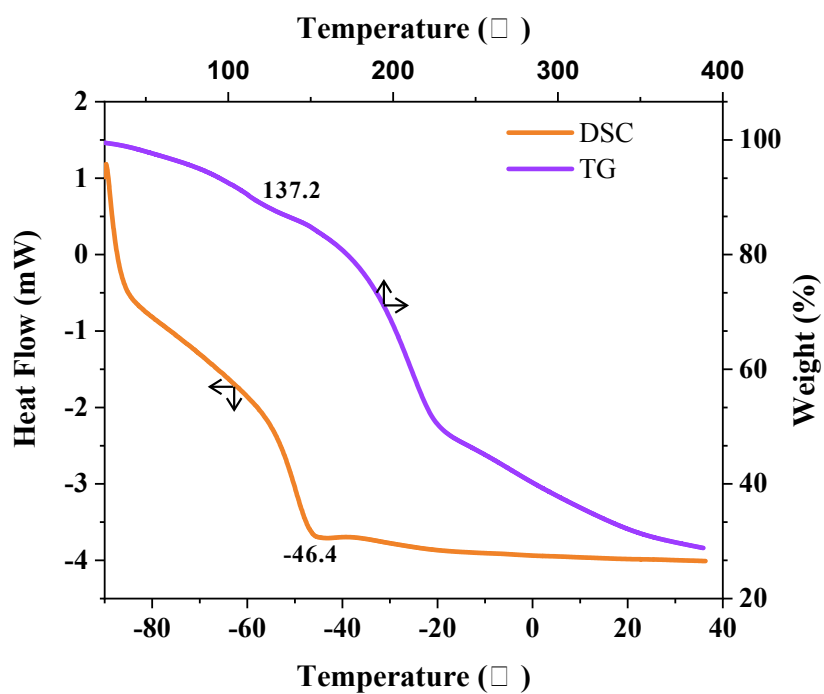

77

78

**Figure S6.** TG and DSC curves of AGU-LAC

79

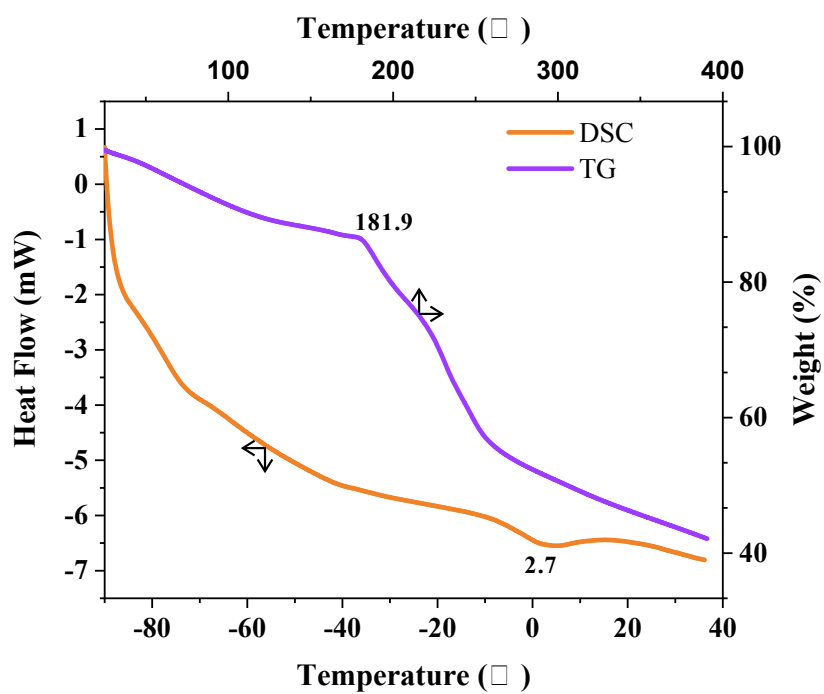

80

81

**Figure S7.** TG and DSC curves of DAG-GA

82

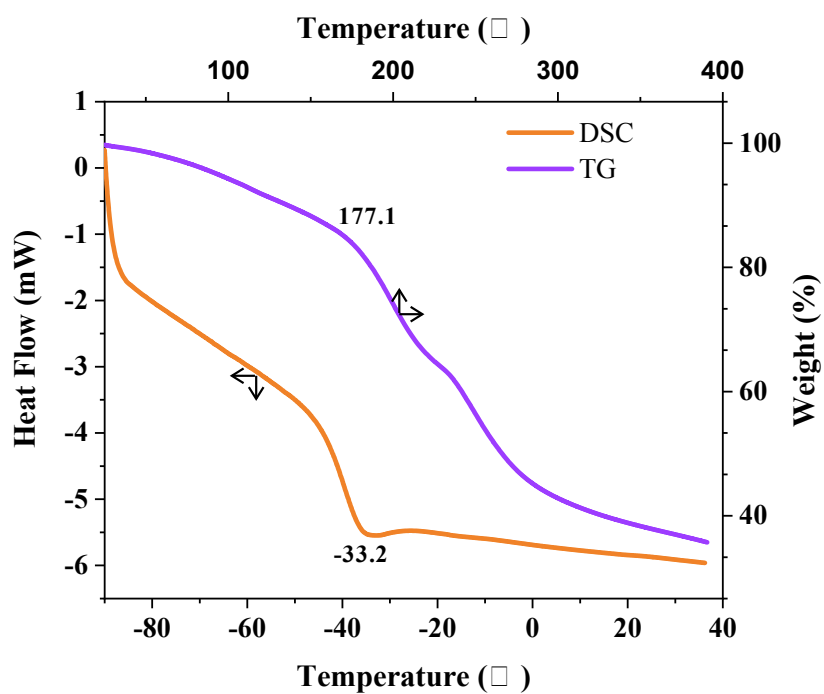

83

84

**Figure S8.** TG and DSC curves of DAG-LAC

85

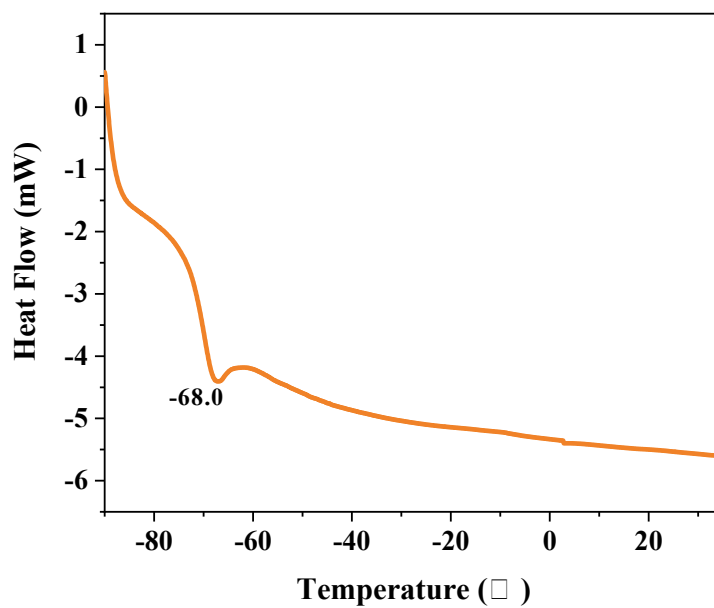

86

87

**Figure S9.** DSC curve of GUC-LAC (HBA:HBD = 1:3)

88

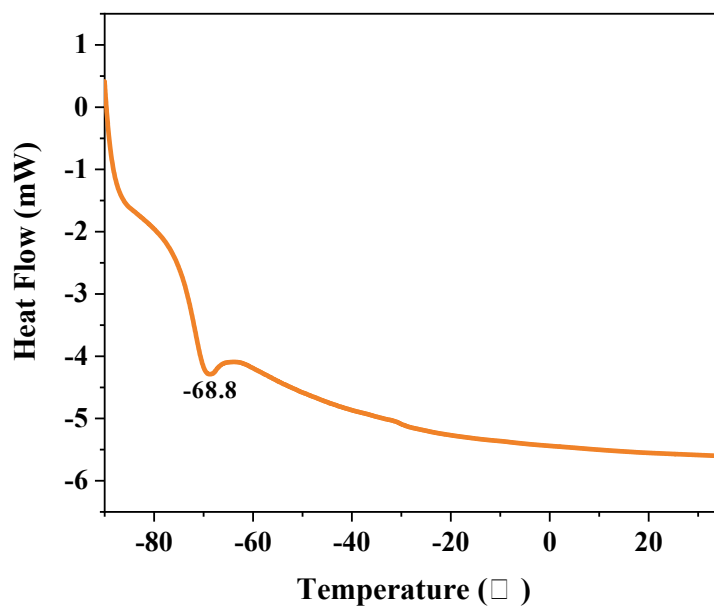

89

90

**Figure S10.** DSC curve of GUC-LAC (HBA:HBD = 1:5)



91

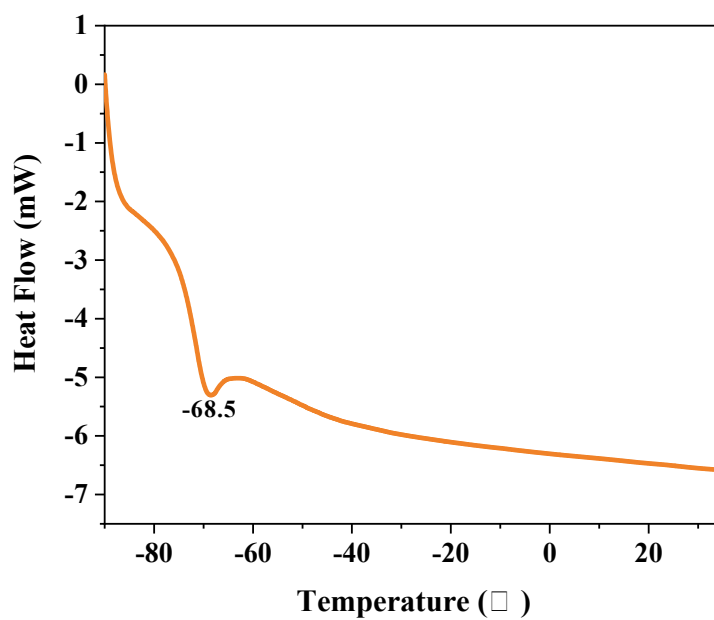

92

93

**Figure S11.** DSC curve of GUC-LAC (HBA:HBD = 1:7)

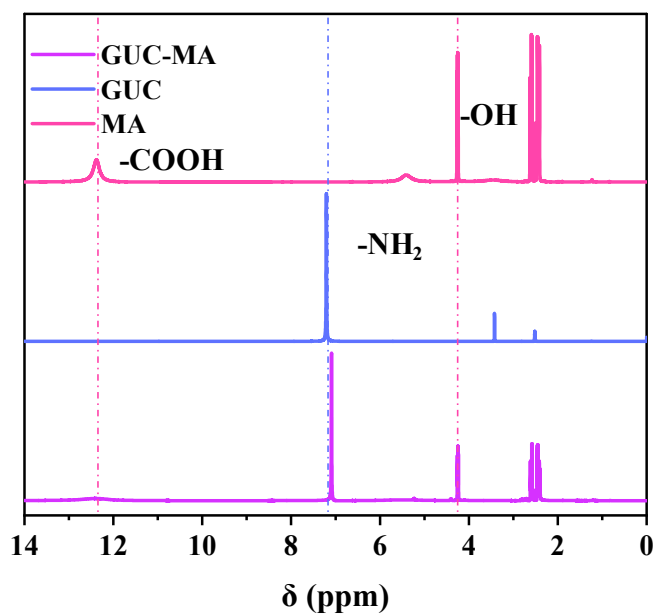

94

95

**Figure S12.** <sup>1</sup>H NMR spectra of GUC-MA and its corresponding HBA and HBD

96

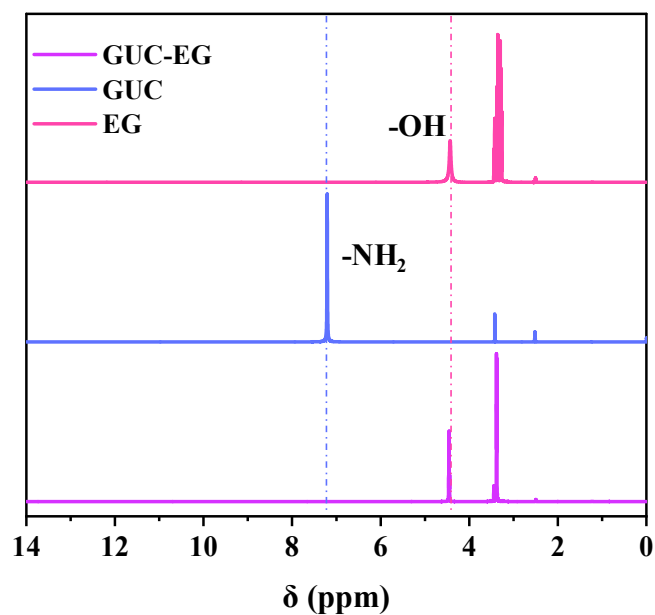

**Figure S13.**  $^1\text{H}$  NMR spectra of GUC-EG and its corresponding HBA and HBD

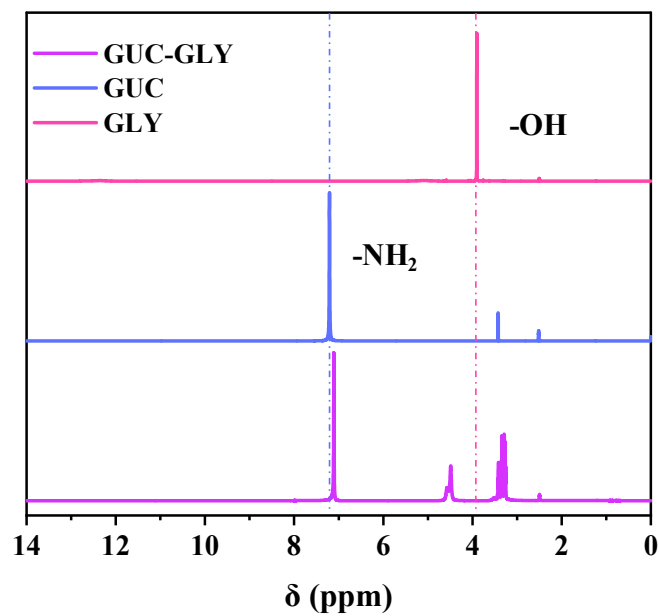

**Figure S14.**  $^1\text{H}$  NMR spectra of GUC-GLY and its corresponding HBA and HBD

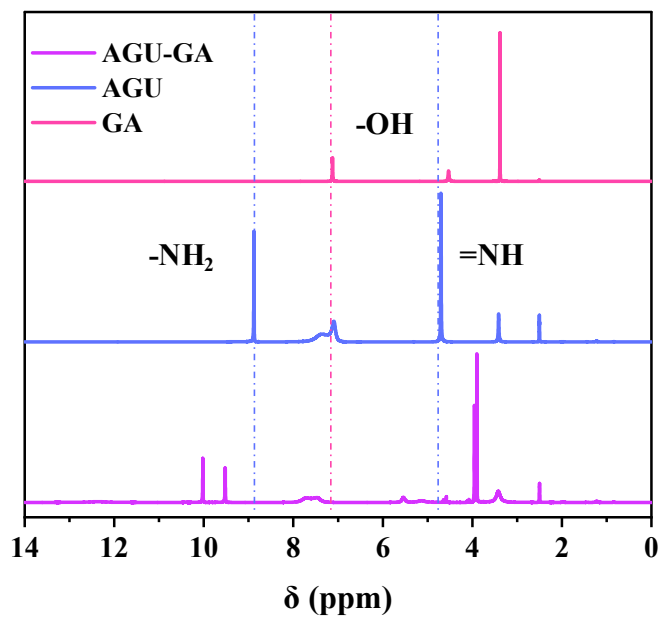

**Figure S15.**  $^1\text{H}$  NMR spectra of AGU-GA and its corresponding HBA and HBD

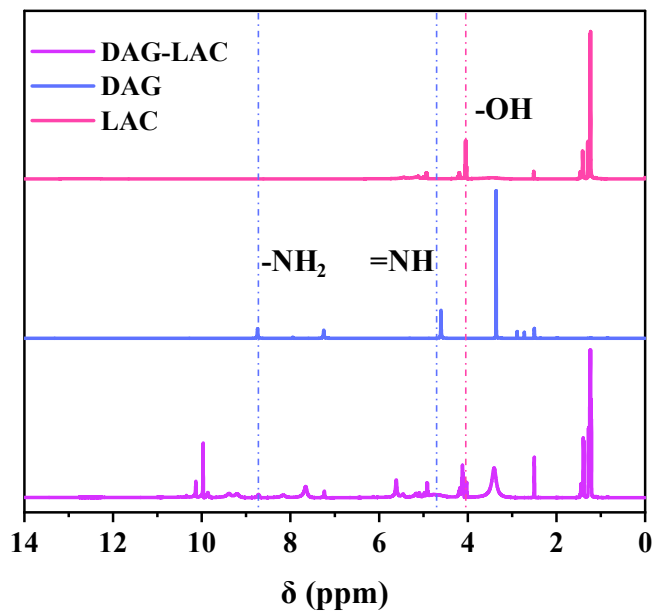

**Figure S16.**  $^1\text{H}$  NMR spectra of DAG-LAC and its corresponding HBA and HBD

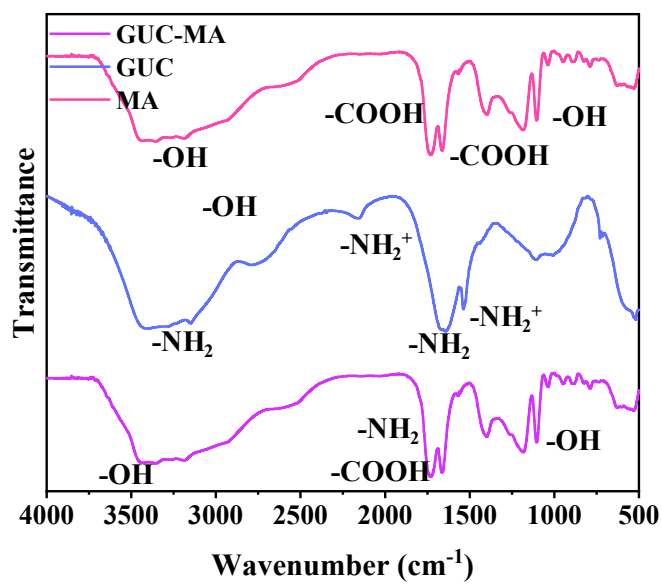

**Figure S17.** FT-IR spectra of GUC-MA and its corresponding HBA and HBD

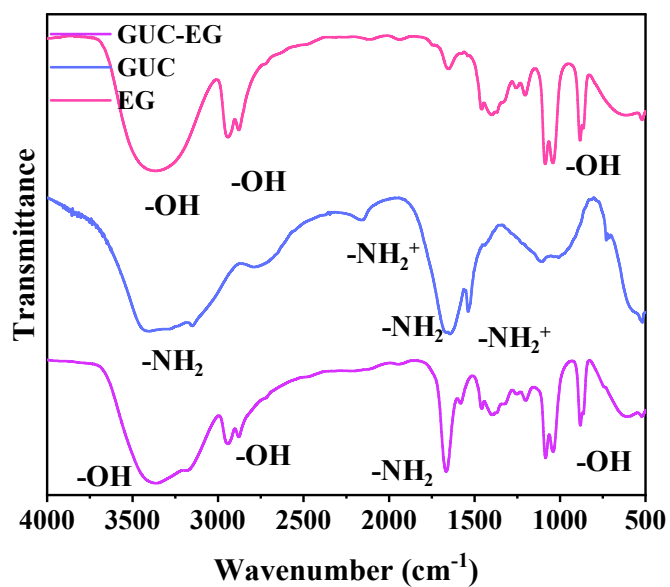

**Figure S18.** FT-IR spectra of GUC-EG and its corresponding HBA and HBD

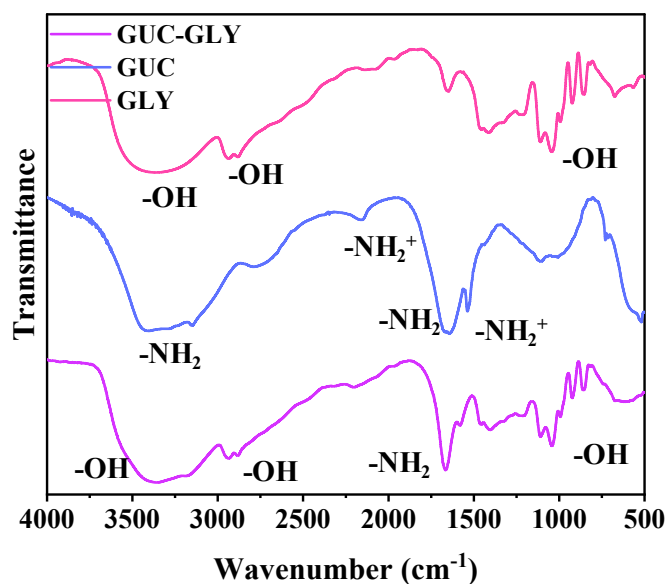

**Figure S19.** FT-IR spectra of GUC-GLY and its corresponding HBA and HBD

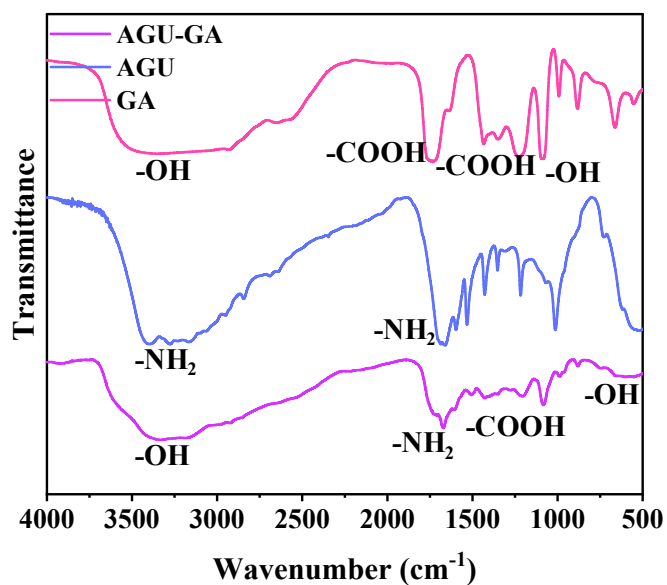

**Figure S20.** FT-IR spectra of AGU-GA and its corresponding HBA and HBD

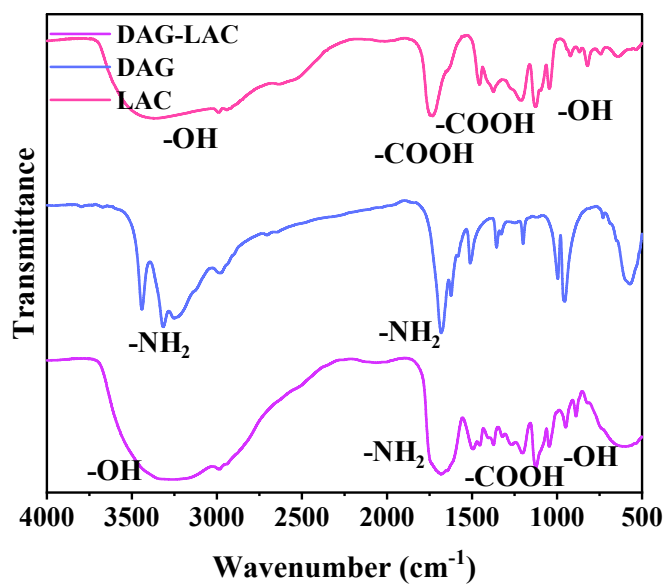

**Figure S21.** FT-IR spectra of DAG-LAC and its corresponding HBA and HBD

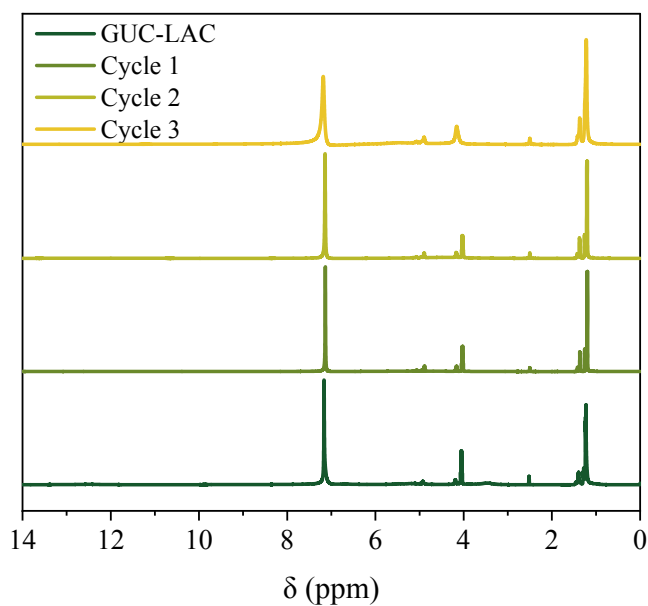

**Figure S22.**  $^1\text{H}$  NMR spectra of recycled GUC-LAC

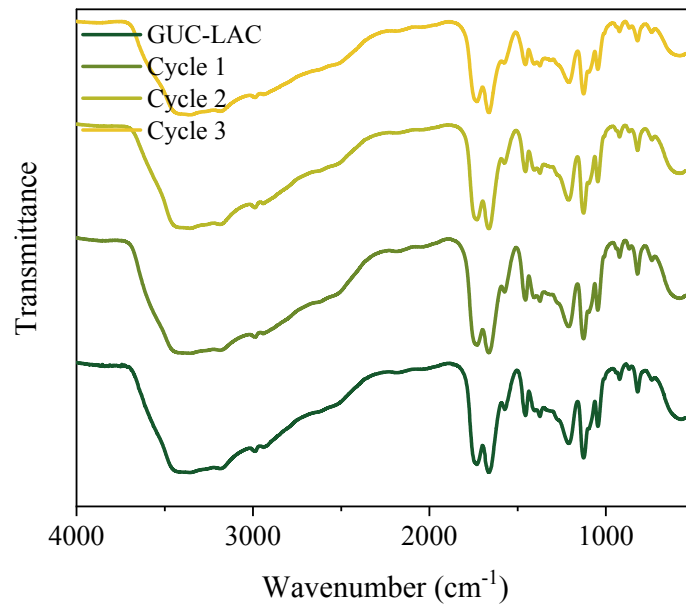

**Figure S23.** FT-IR spectra of recycled GUC-LAC

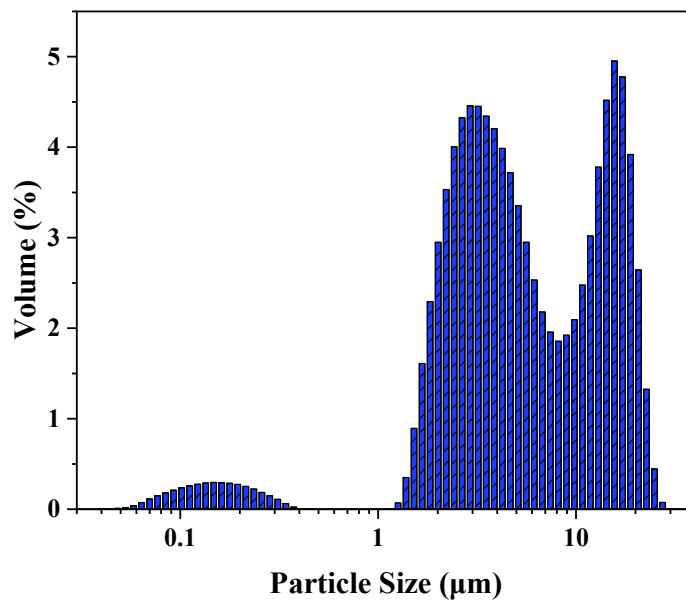

**Figure S24.** Particle Size distribution of  $\text{Nd}_2(\text{C}_2\text{O}_4)_3$

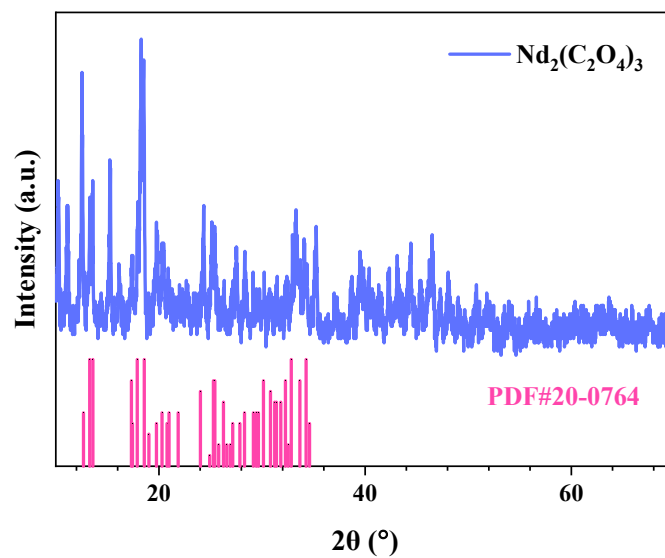

**Figure S25.** PXRD pattern of  $\text{Nd}_2(\text{C}_2\text{O}_4)_3$

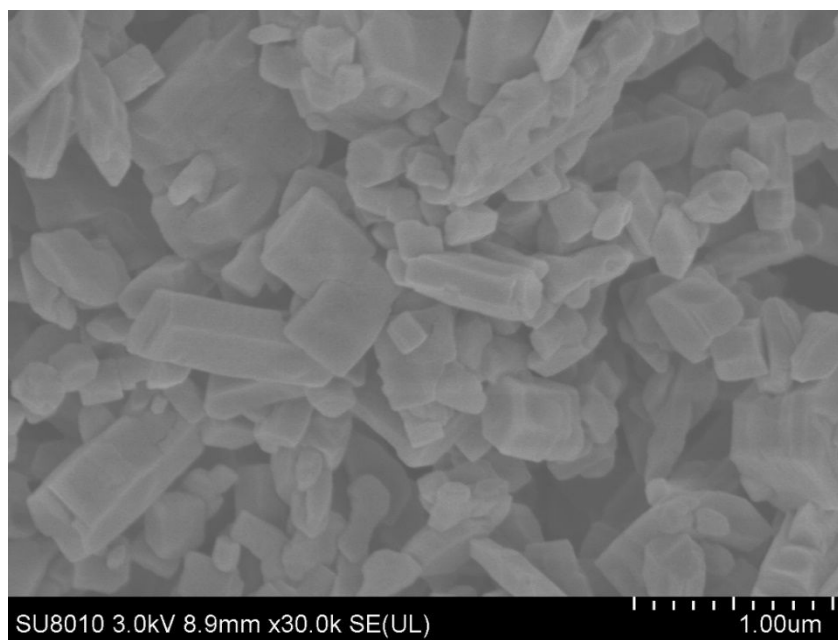

**Figure S26.** SEM image of  $\text{Nd}_2(\text{C}_2\text{O}_4)_3$



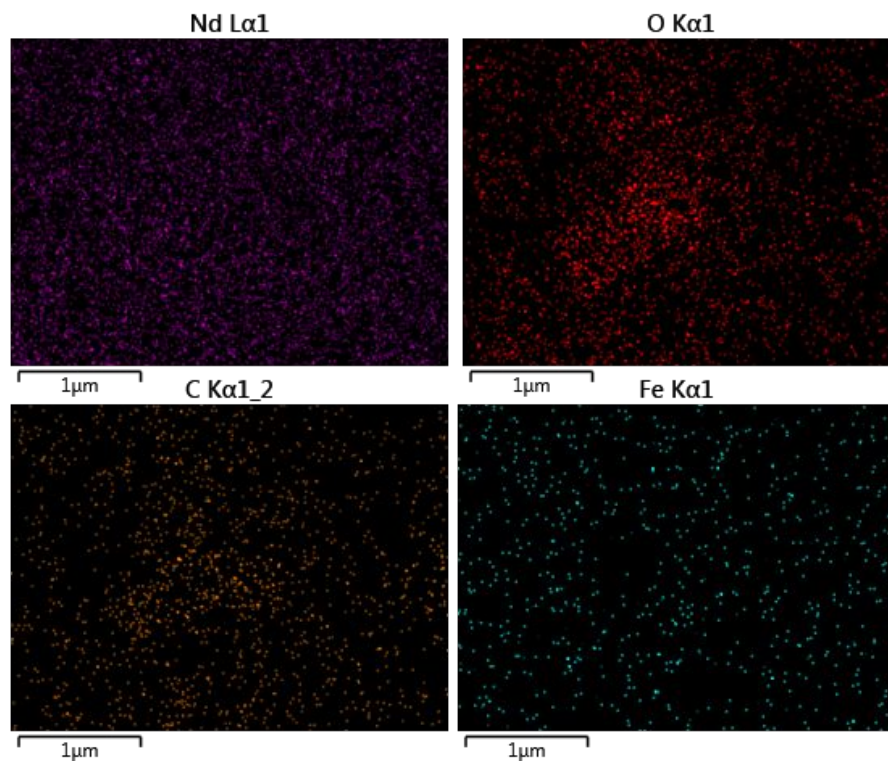

**Figure S27.** EDS elemental mapping of  $\text{Nd}_2(\text{C}_2\text{O}_4)_3$

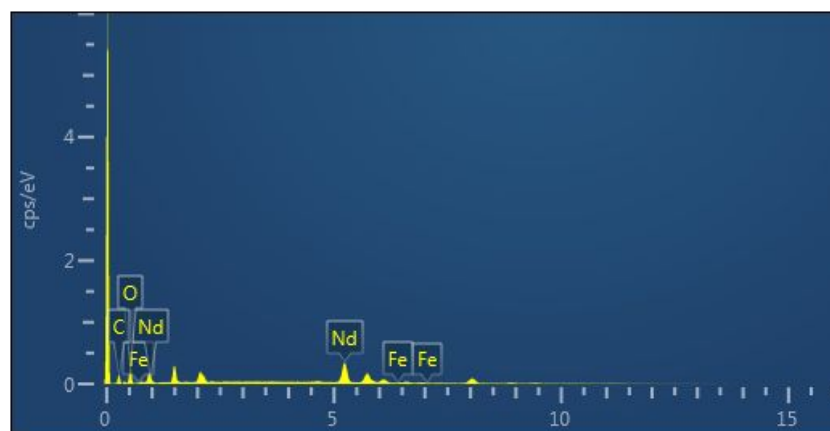

**Figure S28.** EDS spectrum of  $\text{Nd}_2(\text{C}_2\text{O}_4)_3$

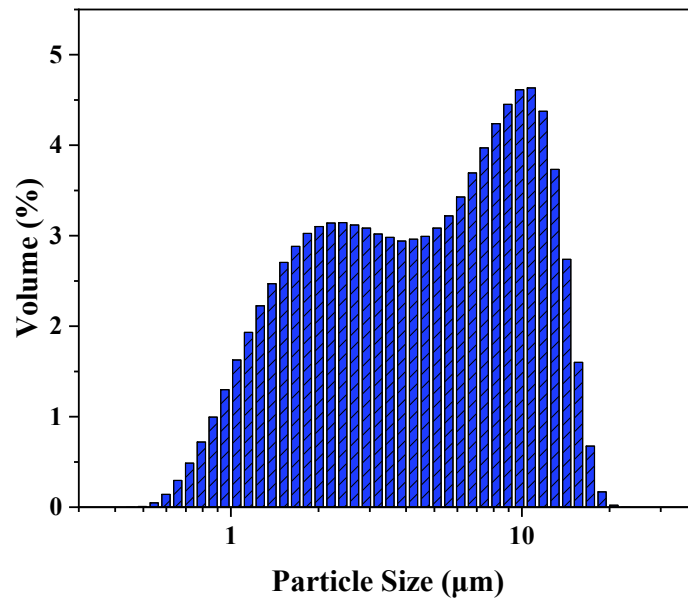

**Figure S29.** Particle Size distribution of  $\text{Nd}_2\text{O}_3$

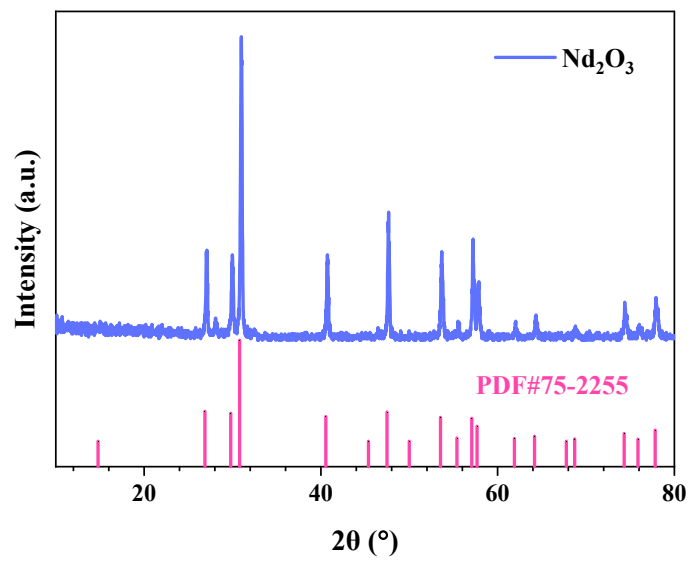

**Figure S30.** PXRD pattern of  $\text{Nd}_2\text{O}_3$

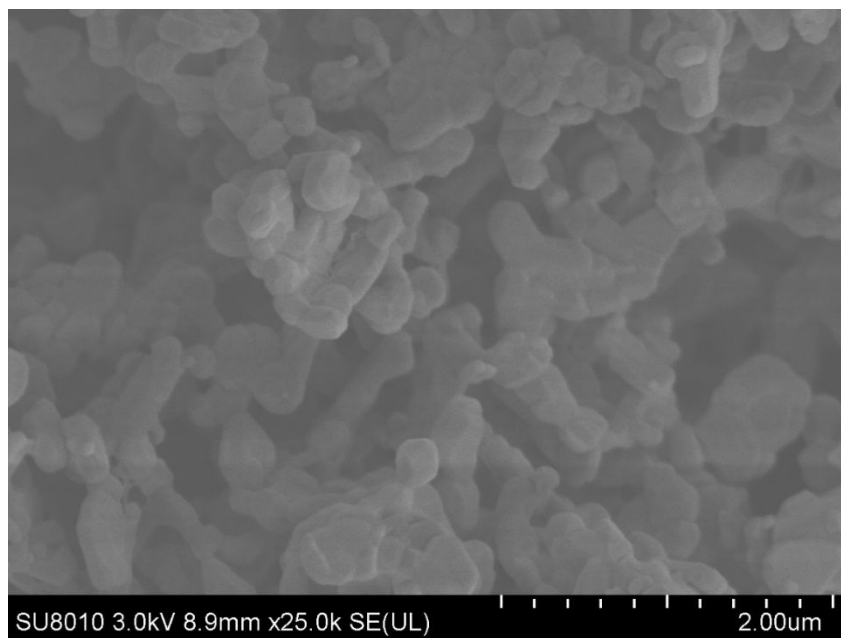

**Figure S31.** SEM image of  $\text{Nd}_2\text{O}_3$

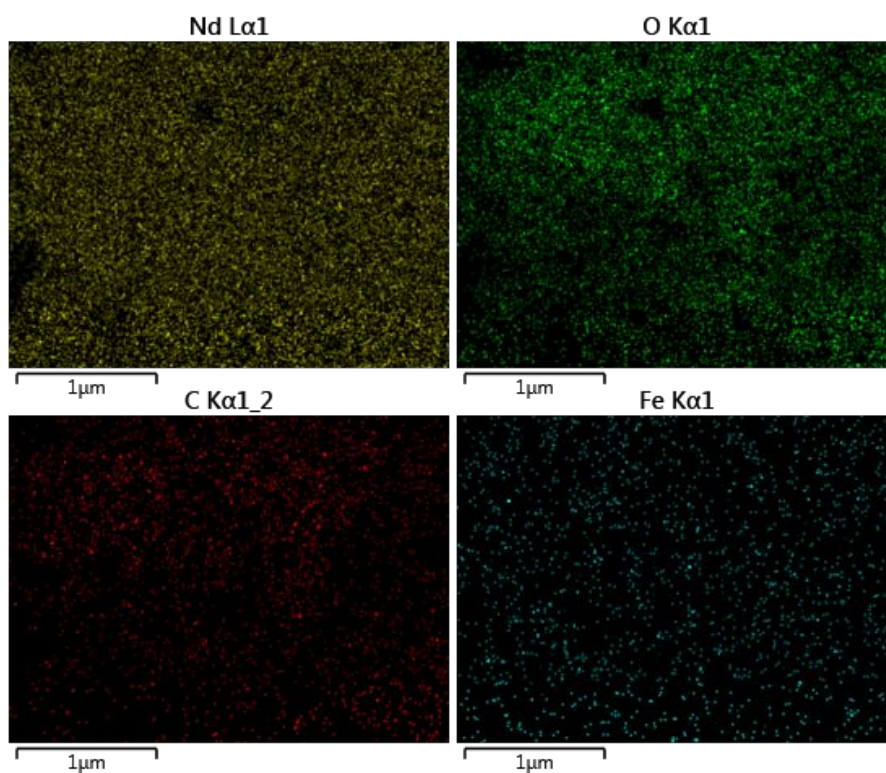

**Figure S32.** EDS elemental mapping of  $\text{Nd}_2\text{O}_3$

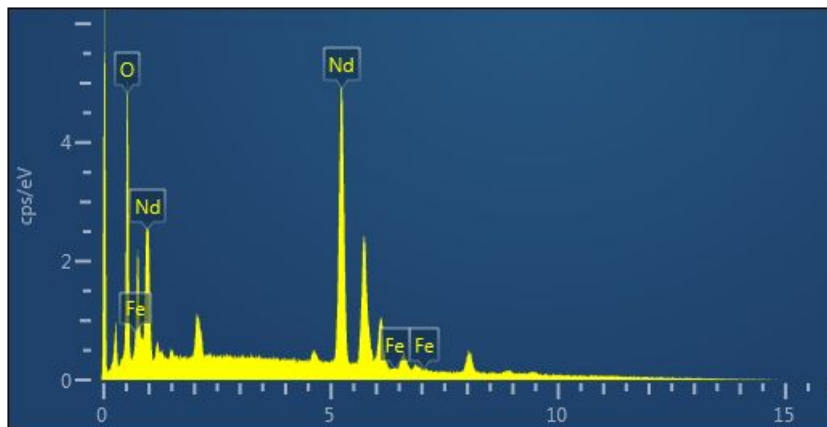

**Figure S33.** EDS spectrum of Nd<sub>2</sub>O<sub>3</sub>

**Table S1.** The standard deviation of dissolution ratio

| Variables                | Condition | D <sub>Nd</sub> | STDEV <sub>Nd</sub> | D <sub>Fe</sub> | STDEV <sub>Fe</sub> |
|--------------------------|-----------|-----------------|---------------------|-----------------|---------------------|
| Time<br>(h)              | 1         | 62.67%          | 0.064892            | 0.13%           | 0.028826            |
|                          | 3         | 72.13%          | 0.068211            | 0.28%           | 0.024895            |
|                          | 6         | 84.23%          | 0.071772            | 1.10%           | 0.040449            |
|                          | 12        | 86.60%          | 0.066807            | 1.84%           | 0.039739            |
|                          | 24        | 86.20%          | 0.051373            | 1.43%           | 0.028262            |
| Temperature<br>(°C)      | 20        | 62.64%          | 0.068668            | 0.20%           | 0.029175            |
|                          | 25        | 75.22%          | 0.066317            | 0.42%           | 0.029588            |
|                          | 30        | 83.57%          | 0.065285            | 0.29%           | 0.01953             |
|                          | 35        | 81.93%          | 0.068843            | 0.47%           | 0.024852            |
|                          | 40        | 84.39%          | 0.069026            | 0.41%           | 0.029281            |
|                          | 50        | 86.20%          | 0.051373            | 1.43%           | 0.028262            |
|                          | 60        | 87.87%          | 0.05627             | 3.86%           | 0.030765            |
| Solid to<br>liquid ratio | 0.1       | 86.20%          | 0.051373            | 1.43%           | 0.028262            |
|                          | 0.2       | 86.43%          | 0.05403             | 1.51%           | 0.023864            |
|                          | 0.3       | 84.51%          | 0.05006             | 1.59%           | 0.025901            |

|                    |         |        |          |       |          |
|--------------------|---------|--------|----------|-------|----------|
|                    | 0.4     | 85.70% | 0.058118 | 0.73% | 0.029118 |
|                    | 0.5     | 86.27% | 0.067892 | 0.60% | 0.026616 |
|                    | 0.7     | 85.57% | 0.056596 | 0.85% | 0.028496 |
| HBD ratio          | 0       | 0.49%  | 0.047006 | 0.19% | 0.032757 |
|                    | 2/3     | 86.20% | 0.051373 | 1.43% | 0.028262 |
|                    | 4/5     | 85.27% | 0.043186 | 2.26% | 0.006186 |
|                    | 8/9     | 81.29% | 0.044524 | 1.98% | 0.018355 |
|                    | 1       | 12.16% | 0.041271 | 0.66% | 0.03712  |
| DESs               | AGU-LAC | 34.45% | 0.055276 | 0.53% | 0.039092 |
|                    | GUC-LAC | 86.20% | 0.051373 | 1.43% | 0.028262 |
|                    | GUC-GA  | 10.50% | 0.039489 | 1.24% | 0.01537  |
|                    | GUC-GLY | 0.23%  | 0.041539 | 0.07% | 0.012755 |
|                    | CC-EG   | 0.01%  | 0.079747 | 0.09% | 0.028903 |
|                    | CC-LAC  | 7.71%  | 0.042455 | 0.34% | 0.35706  |
| Recycle of GUC-LAC | Cycle 0 | 96.37% | 0.074227 | 1.51% | 0.011265 |
|                    | Cycle 1 | 95.24% | 0.073564 | 1.85% | 0.013819 |
|                    | Cycle 2 | 96.61% | 0.079899 | 1.44% | 0.011445 |
|                    | Cycle 3 | 95.61% | 0.072636 | 1.68% | 0.015534 |

**Table S2.** The loaded metal in GUC-LAC after dissolution in practical leaching and recycle

| Element | Cycle 0 (ppm) | Cycle 1 (ppm) | Cycle 2 (ppm) | Cycle 3 (ppm) |
|---------|---------------|---------------|---------------|---------------|
| Nd      | 20466.95      | 21869.74      | 20358.87      | 21480.04      |
| Fe      | 913.40        | 1081.8        | 777.42        | 955.82        |

**Table S3.** The residual metal in GUC-LAC after stripping in practical leaching and recycle

| Element | Cycle 0 (ppm) | Cycle 1 (ppm) | Cycle 2 (ppm) | Cycle 3 (ppm) |
|---------|---------------|---------------|---------------|---------------|
|---------|---------------|---------------|---------------|---------------|

|    |         |         |         |         |
|----|---------|---------|---------|---------|
| Nd | 1460.38 | 2113.64 | 3642.27 | 3714.55 |
| Fe | 727.51  | 447.02  | 753.57  | 992.046 |

159

160

**Table S4.** The metal composition of the Nd<sub>2</sub>O<sub>3</sub> product

| Element           | Nd    | Fe   |
|-------------------|-------|------|
| Mass fraction (%) | 99.56 | 0.44 |

161

162

**Table S5.** Elemental composition of Nd<sub>2</sub>(C<sub>2</sub>O<sub>4</sub>)<sub>3</sub> by EDS spectrum

| Element | Line | Apparent concentration | K       | wt%    | Sigma | Standard Sample  |
|---------|------|------------------------|---------|--------|-------|------------------|
| C       | K    | 3.28                   | 0.03281 | 16.73  | 0.69  | C Vit            |
| O       | K    | 11.86                  | 0.03990 | 14.64  | 0.43  | SiO <sub>2</sub> |
| Fe      | K    | 0.00                   | 0.00000 | 0.00   | 0.35  | Fe               |
| Nd      | L    | 58.84                  | 0.58840 | 68.63  | 0.72  | Nd (v)           |
| Total:  |      |                        |         | 100.00 |       |                  |

163

164

**Table S6.** Elemental composition of Nd<sub>2</sub>O<sub>3</sub> by EDS spectrum

| Element | Line | Apparent concentration | K       | wt%    | Sigma | Standard Sample  |
|---------|------|------------------------|---------|--------|-------|------------------|
| O       | K    | 27.53                  | 0.09263 | 16.57  | 0.24  | SiO <sub>2</sub> |
| Fe      | K    | 0.00                   | 0.00000 | 0.00   | 0.17  | Fe               |
| Nd      | L    | 127.14                 | 1.27143 | 83.43  | 0.24  | Nd (v)           |
| Total:  |      |                        |         | 100.00 |       |                  |

165
